CORRECTION

# Correction: Action Planning and the Timescale of Evidence Accumulation

Konstantinos Tsetsos, Thomas Pfeffer, Pia Jentgens, Tobias H. Donner

There are errors in the Funding section. The correct funding information is as follows:

This work was funded by the Amsterdam Brain and Cognition priority program; grant number: ABC2014-01 (<http://abc.uva.nl/research/nav>), the European Union 7th Framework Programme (FP7/2007-2013) under grant agreement no. 604102 (Human Brain Project; <http://www.humanbrainproject.eu>), and the Deutsche Forschungsgemeinschaft (DFG), SFB 936/Z1 (<http://www.sfb936.net>). These funders had no role in study design, data collection and analysis, decision to publish, or preparation of the manuscript.

## Reference

1. Tsetsos K, Pfeffer T, Jentgens P, Donner TH (2015) Action Planning and the Timescale of Evidence Accumulation. PLoS ONE 10(6): e0129473. doi: [10.1371/journal.pone.0129473](https://doi.org/10.1371/journal.pone.0129473) PMID: [26068458](https://pubmed.ncbi.nlm.nih.gov/26068458/)

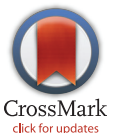

## OPEN ACCESS

**Citation:** Tsetsos K, Pfeffer T, Jentgens P, Donner TH (2015) Correction: Action Planning and the Timescale of Evidence Accumulation. PLoS ONE 10(7): e0133332. doi:10.1371/journal.pone.0133332

**Published:** July 15, 2015

**Copyright:** © 2015 Tsetsos et al. This is an open access article distributed under the terms of the [Creative Commons Attribution License](https://creativecommons.org/licenses/by/4.0/), which permits unrestricted use, distribution, and reproduction in any medium, provided the original author and source are credited.
